# Supplementary material for: The HSP110/HSP70 disaggregation system generates spreading‐competent toxic α‐synuclein species
Source: PubMed Central journal article supplement — EMBO J. 2020 May 25;39(13):e103954. doi: 10.15252/embj.2019103954 (PMC7327497; doi:10.15252/embj.2019103954), 2020-05-25
Supplement: EMBJ-39-e103954-s001.pdf [file EMBJ-39-e103954-s001.pdf]

## Table of Content

1. Appendix Figure S1: The *sid-1(pk3321)* loss-of-function allele does not reduce  $\alpha$ -Syn and Q35 foci formation and toxicity
2. Appendix Figure S2: Total  $\alpha$ -Syn and Q35 protein levels do not change upon KD of HSP-110

## Appendix Figure S1

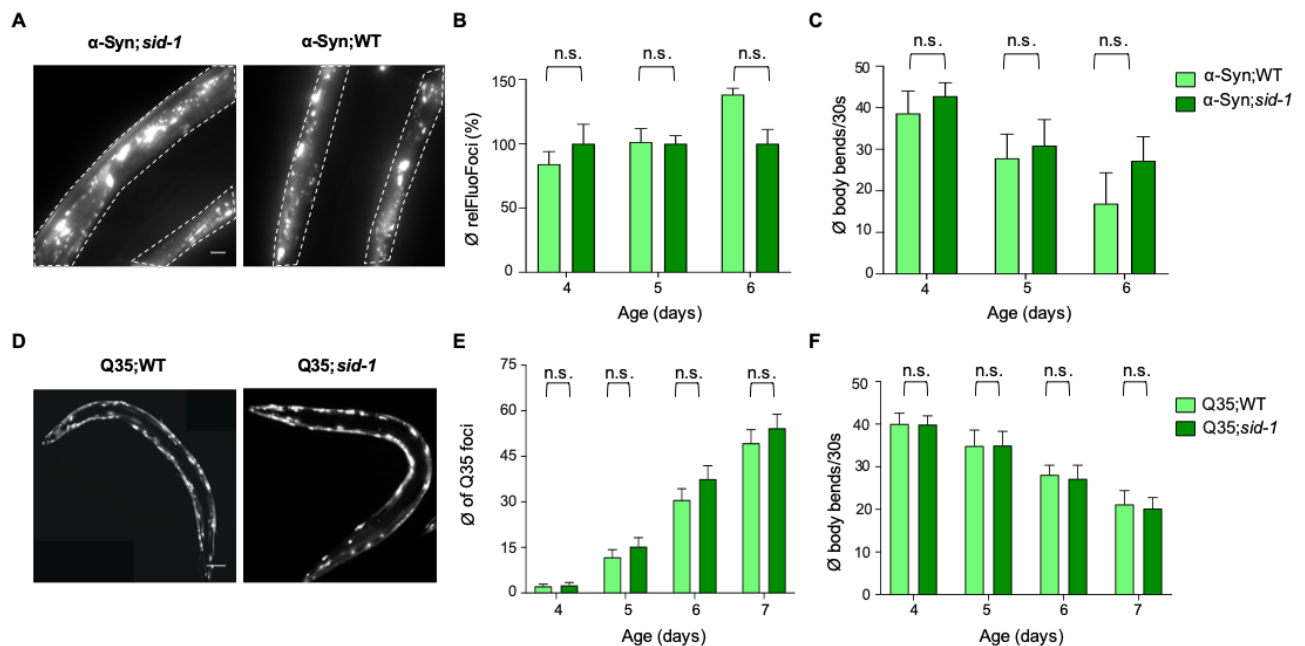

### Appendix Figure S1: The *sid-1(pk3321)* loss-of-function allele does not reduce $\alpha$ -Syn and Q35 foci formation and toxicity

**A** Maximum intensity projections of fluorescent microscopy z-stacks of 5-day-old animals expressing  $\alpha$ -Syn::YFP in the WT and *pk3321* mutant background. White dashed lines outline the borders of muscle cells. Scale bars: 10  $\mu$ m.

**B** Quantification of  $\alpha$ -Syn::YFP foci in 4-, 5-, and 6-day-old worms. RelFluoFoci is displayed (mean  $\pm$  SEM in %). Statistical analysis was done using 2-way ANOVA and post-hoc test with Sidak adjustment for multiple comparisons. n.s. = not significant.

**C** Quantification of motility as a measure for aggregate toxicity. Displayed is the mean amount of body bends per 30 seconds  $\pm$  SEM. Statistical analysis was done using two-way ANOVA with Sidak's adjustment for multiple comparisons. n.s. = not significant.

**D** Maximum intensity projections of fluorescent microscopy z-stacks of 6-day-old animals expressing Q35::YFP in the WT and *pk3321* mutant background. Scale bars: 100  $\mu$ m.

**E** Manual count of Q35::YFP foci in the WT and *pk3321* mutant background (mean  $\pm$  SEM). Statistical analysis was done using two-way ANOVA with Sidak's multiple comparison test. n.s. = not significant.

**F** Quantification of motility as a measure for aggregate toxicity. Displayed is the mean number of body bends per 30 seconds  $\pm$  SEM. Statistical analysis was done using two-way ANOVA with Sidak's multiple comparison test. n.s. = not significant.

## Appendix Figure S2

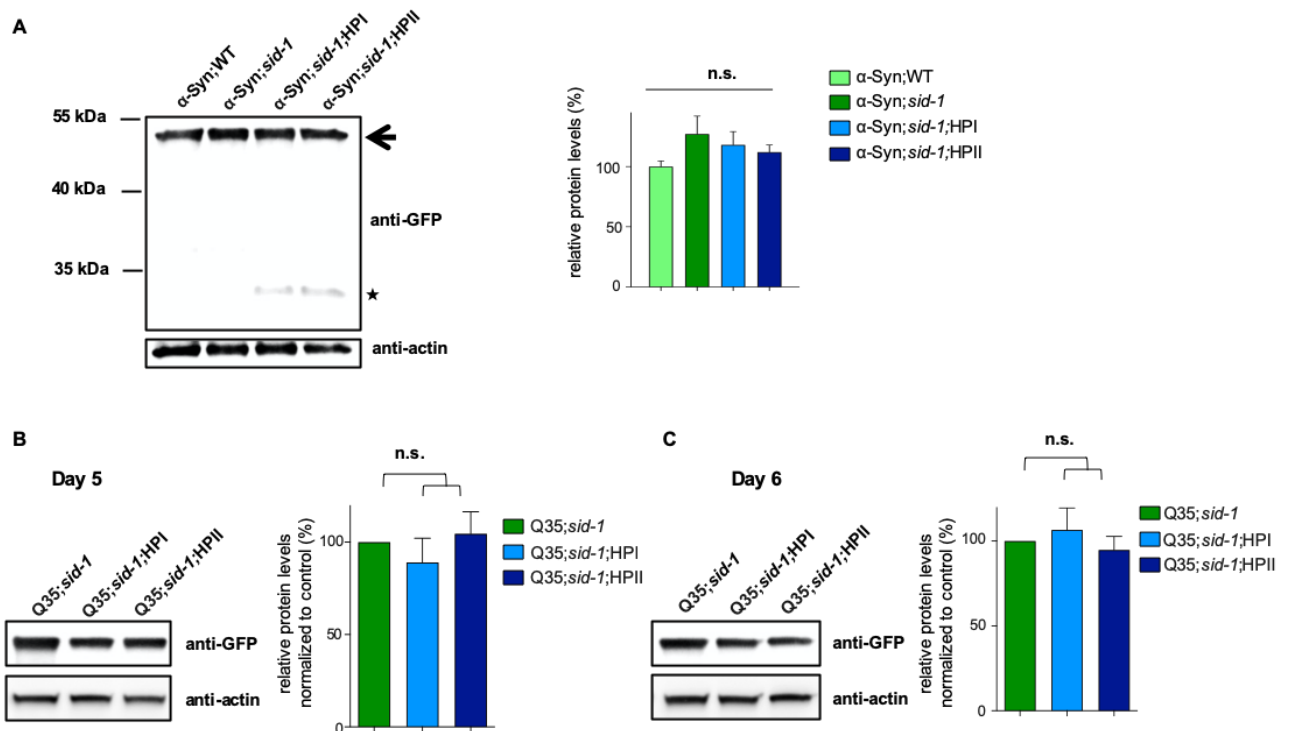

### Appendix Figure S2: Total $\alpha$ -Syn and Q35 protein levels do not change upon KD of HSP-110

**A, B** and **C** Total lysates of age-synchronized strains (**A**: day 5; **B**: day 5 **C**: day 6) expressing the indicated transgenes.  $\alpha$ -Syn::YFP or Q35::YFP were detected with an anti-GFP antibody and anti- $\alpha$ -actin antibody was used as loading control. Respective bar graphs display protein levels relative to the control (mean  $\pm$  SEM in %). Statistical analysis was done using one-way ANOVA with Tukey's multiple comparison test. n.s. = not significant. The KD of HSP-110 did not significantly affect transgene levels. All strains contain the *sid-1(pk3321)* allele.
