# Supplementary material for: The HSP110/HSP70 disaggregation system generates spreading‐competent toxic α‐synuclein species
Source: PubMed Central journal article supplement — EMBO J. 2020 May 25;39(13):e103954. doi: 10.15252/embj.2019103954 (PMC7327497; doi:10.15252/embj.2019103954), 2020-05-25
Supplement: EMBJ-39-e103954-s002.pdf [file EMBJ-39-e103954-s002.pdf]

## Expanded View Figures

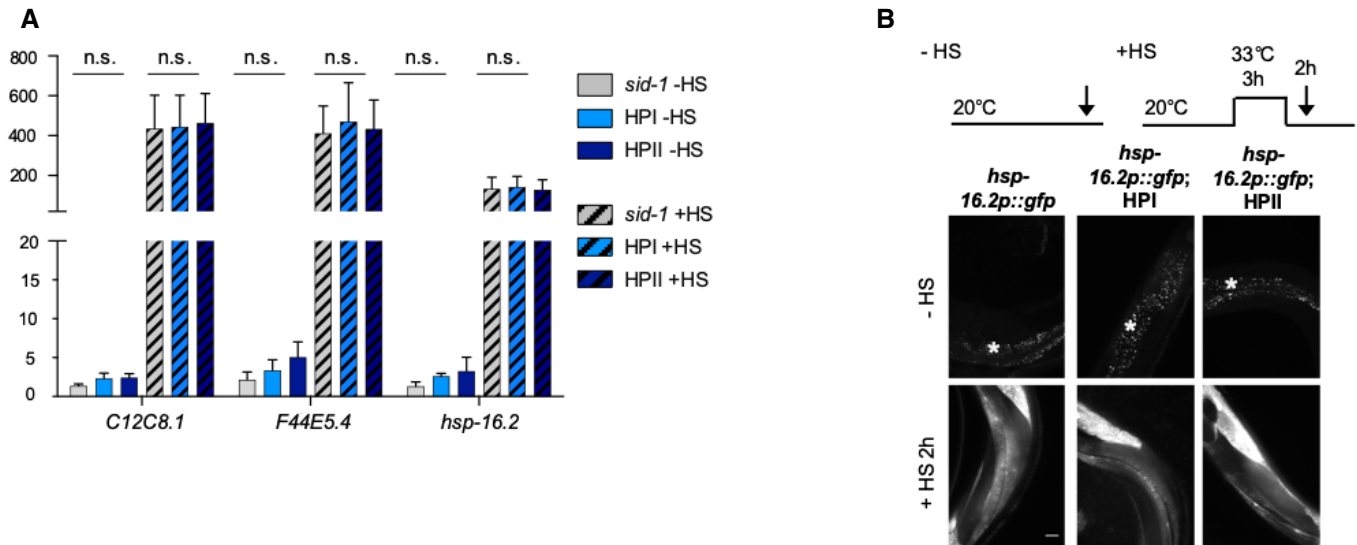

**Figure EV1. KD of HSP-110 does not result in a compensatory activation of the heat shock response.**

A Quantification of mRNA levels in 4-day-old animals expressing the indicated transgenes or harboring the indicated mutation relative to the –HS control of major HS-inducible genes (2 HSP70s, *C12C8.1* and *F44E5.4*, and the small HSP *hsp-16.2*) by real-time (RT)–PCR (mean  $\pm$  SEM,  $N = 4$ ). Statistical analysis was done using two-way ANOVA with Bonferroni's multiple comparison test. n.s. = not significant.

B Experimental set-up: Age-synchronized 4-day-old animals were subjected to heat stress for 3 h at 33°C (+HS) and then returned to 20°C or left at 20°C (–HS), respectively. Arrows indicate imaging time points. The –HS controls were imaged at the same time point as the +HS animals after 2 h at 20°C. Fluorescent microscopy images of animals expressing GFP under the HS-inducible *hsp-16.2* promoter in the control and HSP-110 KD background. Scale bars: 25  $\mu$ m. The KD of HSP-110 did not evoke an heat shock response under ambient growth conditions (only autofluorescence of the gut granules (\*) is visible in –HS strains), but animals were still able to mount an HSR under acute heat stress (+HS). All strains harbor the *sid-1(pk3321)* allele.

**Figure EV2. WT and ATPase-deficient yeast SSE1 can compensate the loss of *Caenorhabditis elegans* HSP-110.**

- A Maximum intensity projections of confocal microscopy z-stacks of 5-day-old animals expressing the indicated transgenes. Scale bar: 10  $\mu$ m. The expression of yeast WT and K69M mutant SSE1 but not FES1 reversed the reduction of  $\alpha$ -Syn::YFP foci in the *hsp-110* hairpin expressing animals.
- B Quantification of motility as a measure for transgene toxicity. Displayed is the mean  $\pm$  SEM ( $N = 3$ ) amount of body bends/30 s of animals expressing the indicated transgenes. Statistical analysis was done using two-way ANOVA with Bonferroni's multiple comparison test. n.s. = not significant, \* $P \leq 0.05$ , \*\* $P \leq 0.01$ , \*\*\* $P \leq 0.001$ . The presence of yeast WT SSE1 and mutant SSE1<sup>K69M</sup> but not FES1 suppressed the rescue of  $\alpha$ -Syn::YFP toxicity in *hsp-110* hairpin expressing animals.
- C Maximum intensity projections of fluorescent microscopy z-stacks of 5-day-old nematodes expressing the indicated transgenes. White dashed lines outline the borders of muscle cells. M: muscle, H: hypodermis. Scale bars: 10  $\mu$ m. Signal outside of muscle cells reveals spreading of  $\alpha$ -Syn.
- D Quantification of animals showing  $\alpha$ -Syn transmission into the hypodermis at indicated ages. Displayed is the mean  $\pm$  SEM (in %) ( $N = 3$ ). Statistical analysis was done using two-way ANOVA with Bonferroni's multiple comparison test. n.s. = not significant, \*\*\* $P \leq 0.001$ .
- E Experimental set-up: Age-synchronized 4-day-old animals were subjected to heat stress for 3 h at 33°C (+HS) and then returned to 20°C or left at 20°C (–HS), respectively. Arrows indicate imaging time points. The –HS controls were imaged at the same time point as the +HS animals after 24 h at 20°C. Maximum intensity projections of fluorescent microscopy z-stacks of animals expressing the indicated transgenes. Scale bar: 20  $\mu$ m. The impaired clearance of HS-induced FLUCSM::GFP foci in the *hsp-110* hairpin expressing cells is rescued by co-expression of WT SSE1 and SSE1<sup>K69M</sup>.
- F Quantification of FLUCSM::GFP foci disaggregation. % disaggregation is calculated as 100—ratio of FLUCSM::GFP foci area relative to total muscle area at the +HS 24 h time point to the +HS 2 h time point. Data are displayed as mean  $\pm$  SEM (in %) ( $N = 3$ ). Statistical analysis was done using one-way ANOVA with Dunnett's multiple comparison test. n.s. = not significant, \*\* $P \leq 0.01$ .

Data information: All strains harbor the *sid-1(pk3321)* allele.

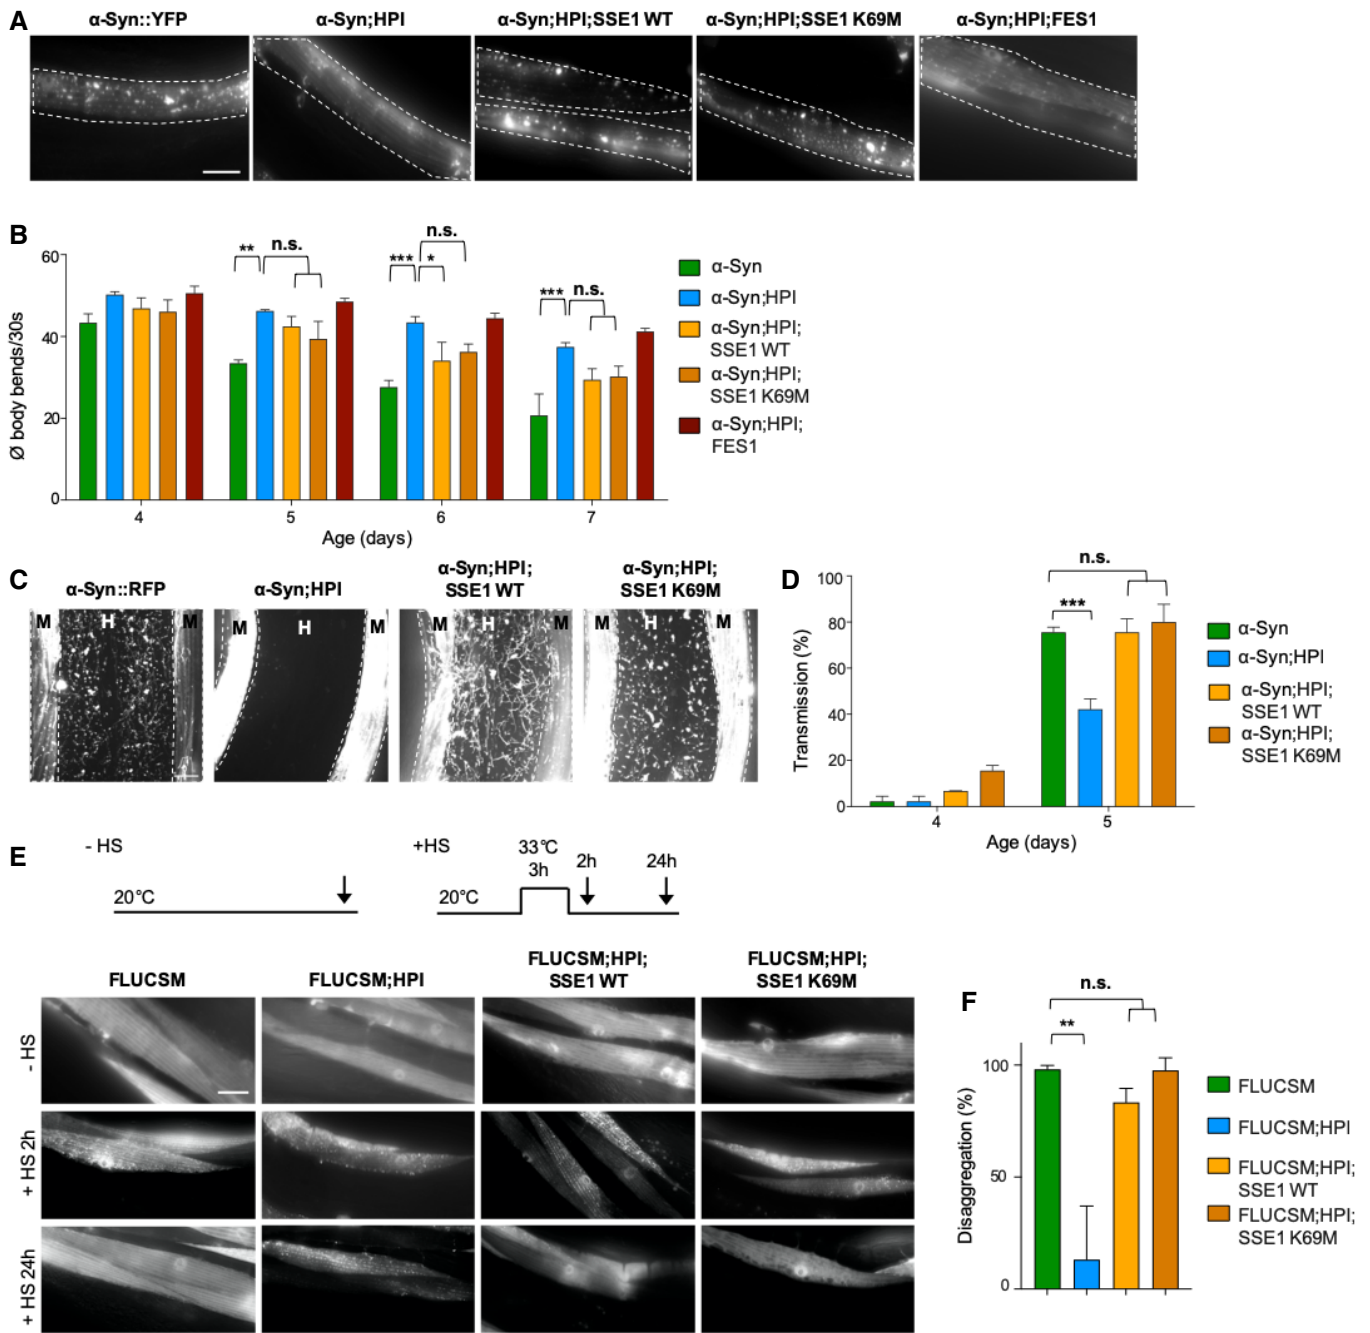

Figure EV2.

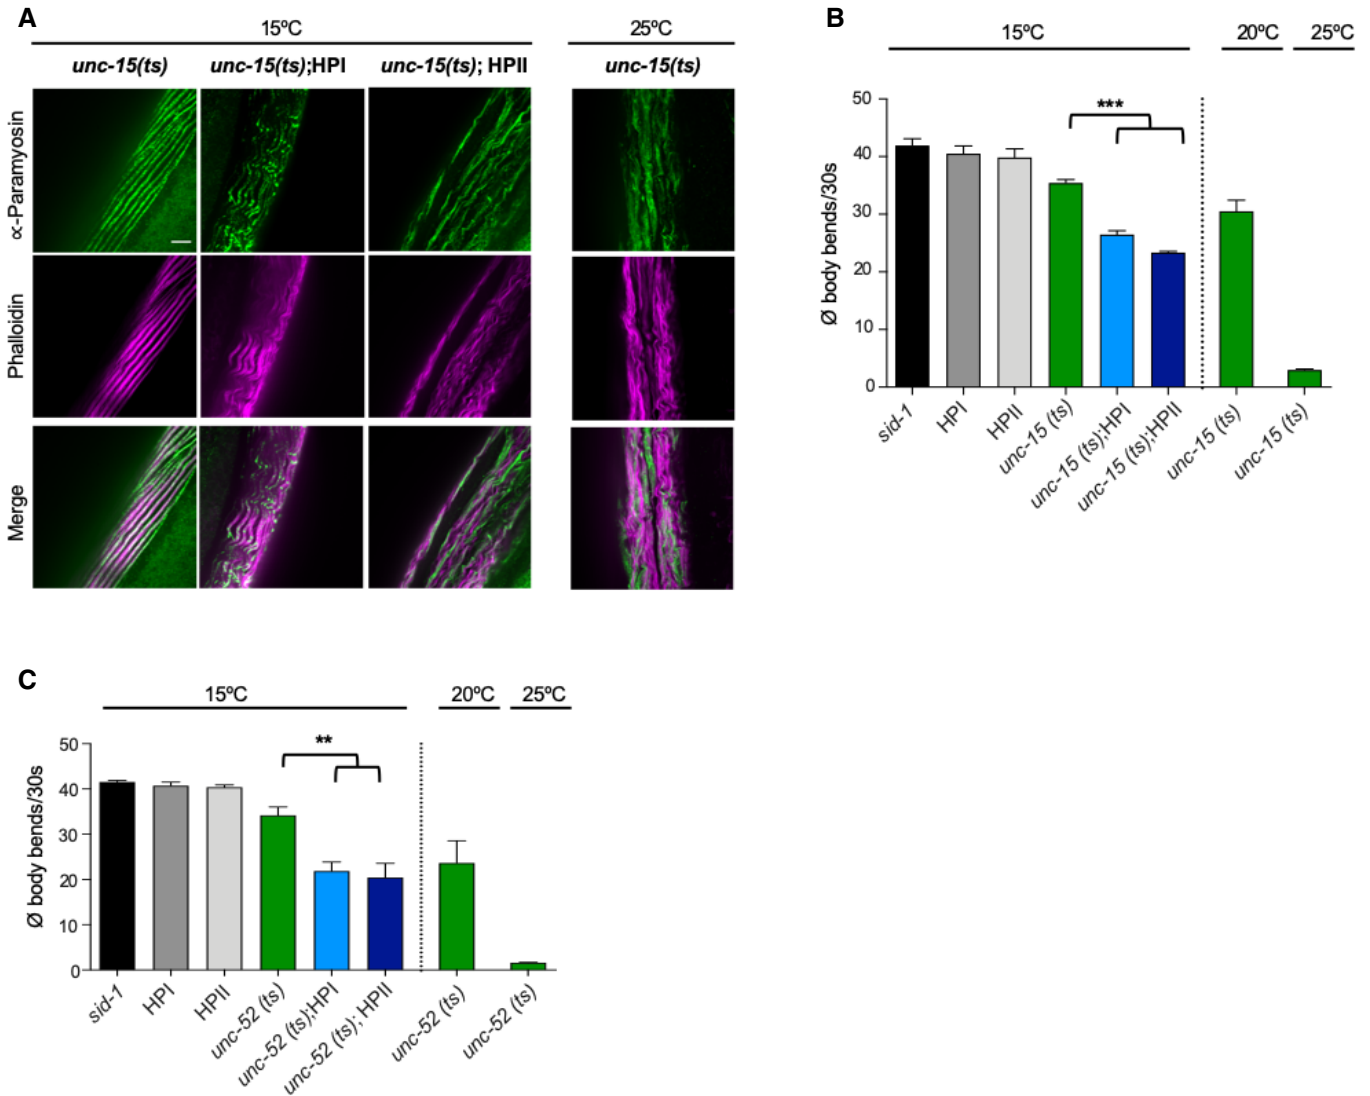

**Figure EV3. HSP-110 HP expression impairs cellular protein folding homeostasis.**

**A** Maximum intensity projections of confocal z-stacks of 4-day-old animals expressing the indicated transgenes or harboring the indicated temperature-sensitive (ts) mutations. Muscle cells were stained with anti-paramyosin (green) and Alexa Fluor 647-phalloidin (purple). Scale bar: 5  $\mu$ m. Paramyosin misfolding revealed that co-expression of the *hsp-110* hairpins exposed the ts mutant phenotype of paramyosin(ts) [*unc-15(e1402)*] at the permissive temperature of 15°C.

**B, C** Quantification of motility as a measure for toxicity. Displayed is the mean  $\pm$  SEM (N = 3) of body bends/30 s of animals expressing the indicated transgenes or harboring the indicated mutations. Statistical analysis was done using one-way ANOVA with Dunnett's multiple comparison test.  $**P \leq 0.01$ ,  $***P \leq 0.001$ . Co-expression of the *hsp-110* hairpins exposed the ts mutant phenotypes already at the permissive temperature of 15°C, resulting in a significant increase in movement defects. All strains harbor the *sid-1(pk3321)* allele.

**Figure EV4. HSP-110 HP expression does not affect WT myosin or paramyosin folding.**

- A Quantification of motility as a measure for transgene toxicity. Displayed is the mean  $\pm$  SEM ( $N = 3$ ) of body bends/30 s of animals expressing the indicated transgenes or harboring the indicated mutations. Statistical analysis was done using one-way ANOVA with Dunnett's multiple comparison test. Animals that express the *hsp-110* hairpins show normal movement at 15 and 25°C.
- B–E Maximum intensity projections of confocal z-stacks of 4-day-old animals expressing the indicated transgenes or harboring the indicated mutations. Muscle cells were stained with (B) and (C) anti-myosin (green) or (D) and (E) anti-paramyosin (green), and Alexa Fluor 647-phalloidin (purple). Scale bar: 5  $\mu$ m. Animals expressing the *hsp-110* hairpins exhibited a normal myosin and paramyosin structure at 15 and 25°C. All strains harbor the *sid-1(pk3321)* allele.

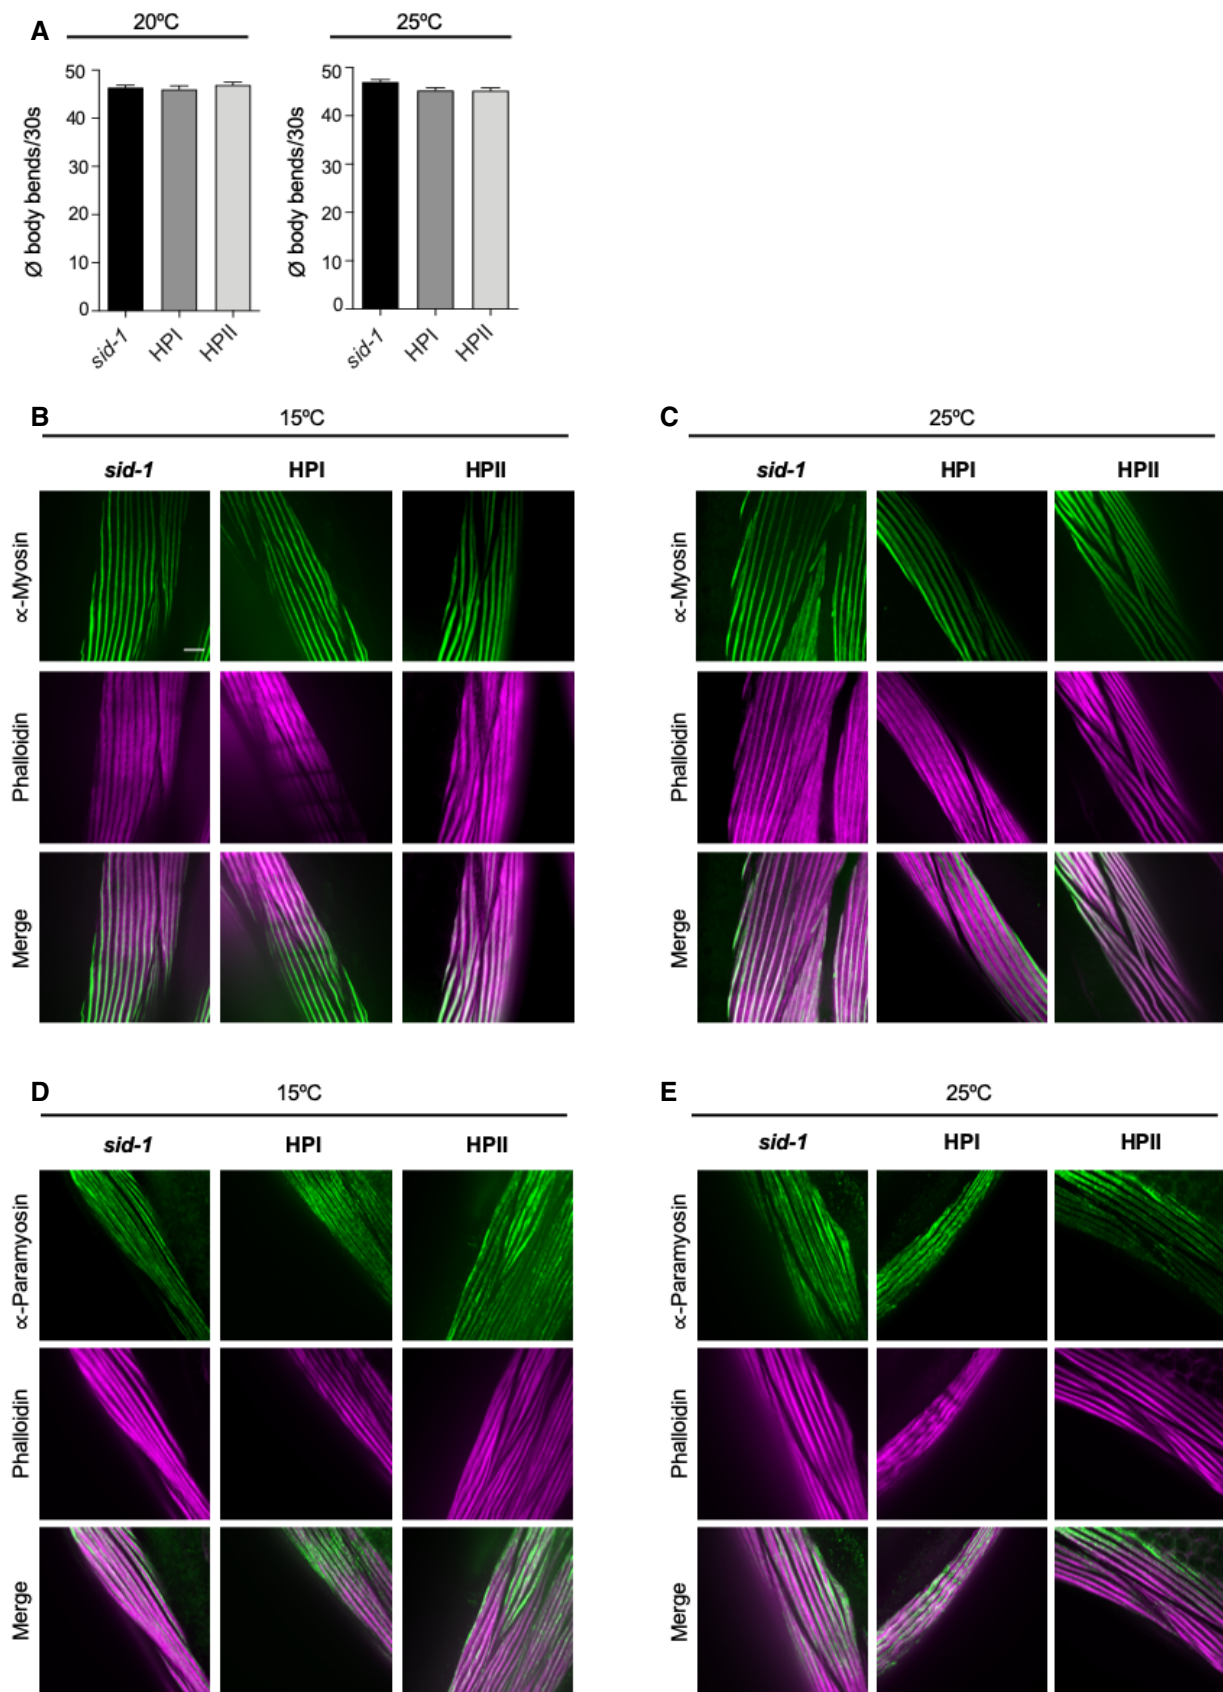

Figure EV4.

**Figure EV5. HSP-110 HP expression impairs cellular protein folding homeostasis during aging.**

- A Quantification of motility as a measure for transgene toxicity. Displayed is the mean  $\pm$  SEM ( $N = 3$ ) amount of body bends/30 s of animals expressing the indicated transgenes or harboring the indicated mutations. Statistical analysis was done using two-way ANOVA with Tukey's multiple comparison test. \* $P \leq 0.05$ , \*\* $P \leq 0.01$ . Expression of the *hsp-110* hairpins causes movement defects with increasing age at 25°C.
- B Single plane confocal fluorescent microscopy images of 10-day-old animals harboring the indicated transgenes or endogenously tagged proteins. Muscle cells are outlined. Muscle cell-specific HSP-110::GFP depletion persisted during aging in HP animals. M: muscle, H: hypodermis. Scale bars: 10  $\mu\text{m}$ .
- C Maximum intensity projections of confocal z-stacks of 12-day-old animals expressing the indicated transgenes or mutations. White dashed lines outline the borders of muscle cells. Scale bar: 10  $\mu\text{m}$ .  $\alpha$ -Syn::YFP foci number remained low and did not increase in old HPI and HPII animals.
- D Quantification of the ratio of  $\alpha$ -Syn::YFP foci in 12-day-old animals to 5-day-old animals. The ratio of the product of mean foci fluorescence and foci area relative to muscle area from 12-day-old to 5-day-old animals is displayed (relFluoFoci). Data are shown as mean  $\pm$  SEM ( $N = 3$ ). All strains harbor the *sid-1(pk3321)* allele.
- E Single plane fluorescent microscopy images of 12-day-old animals harboring the indicated transgenes.
- F Quantification of Q35::YFP foci in WT and *hsp-110* hairpin background. Shown is the mean for each strain and age  $\pm$  SEM ( $N = 3$ ). Statistical analysis was done using two-way ANOVA with Dunnett's multiple comparison test. n.s. = not significant.

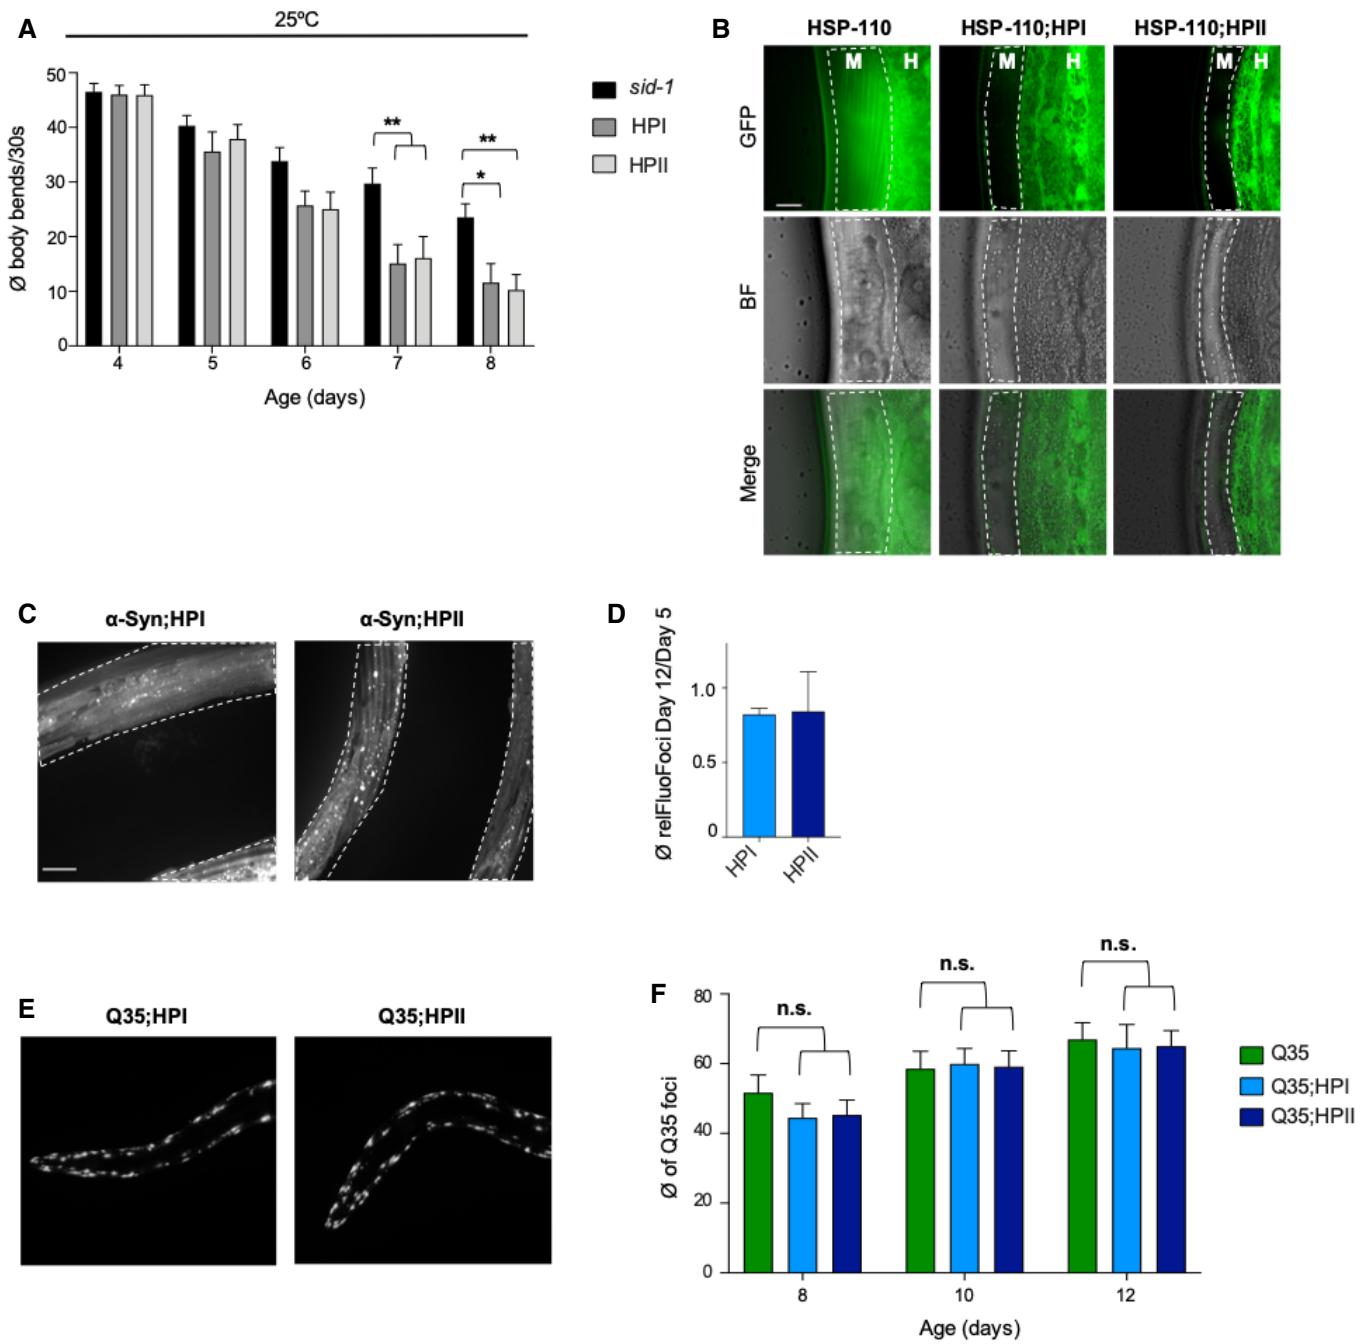

Figure EV5.
